# Supplementary material
Source: PubMed Central journal article supplement (PMC3934798)
Supplement: NIHMS545174-supplement-01.pdf [file NIHMS545174-supplement-01.pdf]

Table 1: Listing of PCR analytes – and fold change in expression levels

| Pathway            | Symbol                          | Gene Name                                                           | Fold Difference |
|--------------------|---------------------------------|---------------------------------------------------------------------|-----------------|
| ECM Degradation    | Mmp14                           | Matrix metalloproteinase 14 (membrane-inserted)                     | 0.26            |
|                    | Mmp2                            | Matrix metalloproteinase 2                                          | 0.22            |
|                    | Mmp11                           | Matrix metalloproteinase 11                                         | 1.75            |
|                    | Mmp15                           | Matrix metalloproteinase 15                                         | 0.73            |
|                    | Timp2                           | Tissue inhibitor of metalloproteinase 2                             | 0.37            |
|                    | Timp4                           | Tissue inhibitor of metalloproteinase 4                             | 0.27            |
|                    | Timp1                           | Tissue inhibitor of metalloproteinase 1                             | 2.45            |
|                    | Serpine2                        | (PAI-2) Serine (or cysteine) peptidase inhibitor, clade E, member 2 | 0.22            |
| ECM Deposition     | Col1a1                          | Procollagen, type VI, alpha 1                                       | 0.20            |
|                    | Col3a1                          | Procollagen, type III, alpha 1                                      | 0.03            |
|                    | Eln                             | Elastin                                                             | 0.33            |
|                    | Lamb3                           | Laminin, beta 3                                                     | 0.42            |
|                    | Fn1                             | Fibronectin 1                                                       | 0.54            |
|                    | Fbn2                            | Fibrillin 2                                                         | 1.56            |
|                    | Fbn1                            | Fibrillin 1                                                         | 0.51            |
|                    | Thbs1                           | Thrombospondin 1                                                    | 0.50            |
|                    | Sparc                           | (SPARC) Secreted acidic cysteine rich glycoprotein                  | 1.37            |
|                    | Ltbp2                           | Latent transforming growth factor beta binding protein 2            | 0.34            |
|                    | Ltbp1                           | Latent transforming growth factor beta binding protein 1            | 0.24            |
|                    | Acvr1l                          | Activin A receptor, type II-like 1 (ALK-1)                          | 0.23            |
|                    | Acvr1                           | Activin A receptor, type 1 (ALK-2)                                  | 0.71            |
|                    | Tgfb1                           | Transforming growth factor, beta 1                                  | 2.17            |
|                    | Tgfb2                           | Transforming growth factor, beta 2                                  | 0.84            |
|                    | Smad1                           | MAD homolog 1 (Drosophila)                                          | 0.34            |
|                    | Smad5                           | MAD homolog 5 (Drosophila)                                          | 0.56            |
|                    | Smad2                           | MAD homolog 2 (Drosophila)                                          | 0.74            |
|                    | Smad3                           | MAD homolog 3 (Drosophila)                                          | 8.83            |
|                    | Smad6                           | MAD homolog 6 (Drosophila)                                          | 0.97            |
| Smad7              | MAD homolog 7 (Drosophila)      | 0.30                                                                |                 |
| Ctgf               | Connective tissue growth factor | 1.10                                                                |                 |
| Cellular Signaling | Il6                             | Interleukin 6                                                       | 0.42            |
|                    | Mapk12                          | (p38MAPK- $\gamma$ ) Mitogen-activated protein kinase 12            | 0.67            |
|                    | Mapk11                          | (p38MAPK- $\beta$ ) Mitogen-activated protein kinase 11             | 0.18            |
|                    | Mapk14                          | (p38MAPK- $\alpha$ ) Mitogen activated protein kinase 14            | 0.86            |
|                    | Mapk1                           | (ERK-2) Mitogen activated protein kinase 1                          | 0.81            |
|                    | Mapk3                           | (ERK-1) Mitogen activated protein kinase 3                          | 3.46            |
|                    | Mapk8                           | (JNK) Mitogen activated protein kinase 8                            | 0.91            |
|                    | Eif3s2                          | Mitogen activated protein kinase 9                                  | 1.08            |
|                    | Prkca                           | Protein kinase C, alpha                                             | 0.22            |
|                    | Prkcb1                          | Protein kinase C, beta 1                                            | 1.26            |
|                    | Prkcd                           | Protein kinase C, delta                                             | 0.76            |
|                    | Prkch                           | Protein kinase C, eta                                               | 3.82            |
|                    | Prkci                           | Protein kinase C, iota                                              | 0.72            |
|                    | Plau                            | Plasminogen activator, urokinase                                    | 1.49            |
|                    | Edn1                            | (Preproendothelin-1) Endothelin 1                                   | 4.12            |
|                    | Ednra                           | Endothelin receptor type A                                          | 4.26            |

Table 2: Listing of immunoblotting analytes

| <b>Antibody</b>        | <b>Company Name</b>                        | <b>Catalog Number</b> | <b>Molecular Weight (kDa)</b> | <b>Gel Loading</b> |
|------------------------|--------------------------------------------|-----------------------|-------------------------------|--------------------|
| Angiopoietin-1         | LifeSpan BioSciences<br>(Seattle, WA)      | LS-C139797            | 48 kDa                        | 4-12% Bis-Tris     |
| Angiostatin<br>(AS4.5) | EMD Millipore (Bellerica, MA)              | PC371                 | 50 kDa                        | 4-12% Bis-Tris     |
| Endoglin               | Cell Signaling Technology<br>(Danvers, MA) | 4335                  | 95 kDa                        | 4-12% Bis-Tris     |
| KLF2                   | Sigma-Aldrich (St. Louis, MO)              | AV37859               | 40 kDa                        | 4-12% Bis-Tris     |
| TEK (Tie-2)            | Santa Cruz Biotechnology<br>(Dallas, TX)   | sc-324                | 150 kDa                       | 3-8 % Tris Acetate |
| VEGF                   | Santa Cruz Biotechnology                   | sc-507                | 28 kDa                        | 4-12% Bis-Tris     |
| HIF1alpha              | Abcam (Cambridge, MA)                      | Ab16066               | 116 kDa                       | 4-12% Bis-Tris     |
| HO-1                   | Santa Cruz                                 | Sc-7695               | 32 kDa                        | 4-12% Bis-Tris     |
| $\beta$ -actin         | Bio Vision (San Francisco, CA)             | 3662-100              | 45 kDa                        | Both               |
